# Supplementary material for: An environment friendly electrochemical synthesis of 1,1,4,4-tetramethyl-2-tetrazene energetic materials from undimethylhydrazine
Source: Royal Society of Chemistry journal article supplement (doi:10.1039/d3cc04693a), 2023-01-01
Supplement: d3cc04693a1.pdf [file d3cc04693a1.pdf]

## Electronic Supporting Information (ESI)

### An environment friendly electrochemical synthesis of 1,1,4,4-tetramethyl-2-tetrazene energetic materials from undimethylhydrazine

Qi Xue,<sup>a,†</sup> Mi Zhang,<sup>b,†</sup> liang He,<sup>b</sup> Fu-Qing Bi,<sup>\*a</sup> Bo-Zhou Wang<sup>a</sup> and Bin Liu<sup>\*b</sup>

<sup>a</sup> Xi'an Modern Chemistry Research Institute, Xi'an 710065, China.

<sup>b</sup> Key Laboratory of Synthetic and Natural Functional Molecule of the Ministry of Education, Xi'an Key Laboratory of Functional Supramolecular Structure and Materials, College of Chemistry and Materials Science, Northwest University, Xi'an 710127, P. R. China, E-mail: [liubin@nwu.edu.cn](mailto:liubin@nwu.edu.cn), [bifu-qiang@gmail.com](mailto:bifu-qiang@gmail.com)

† Two authors contributed equally to this work.

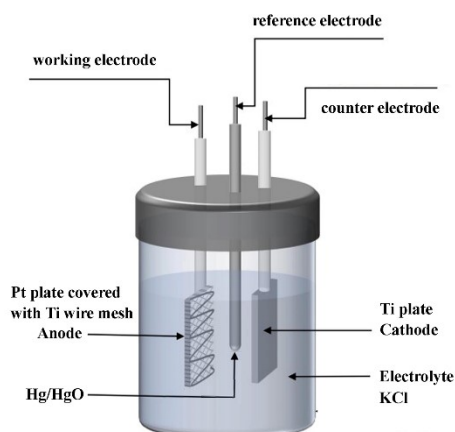

Fig. S1 The diagram of a representative three-electrodes electrochemical synthesis system.

GC-MS data were recorded on Shimadzu QC-MS 2010PLUS\*. The temperature of the column box was set at 40 °C, and the temperature of the injection port was 180 °C. The temperature program is 10°C/min heating rate from 40°C to 150°C and 15°C/min

heating rate from 150°C to 200°C.

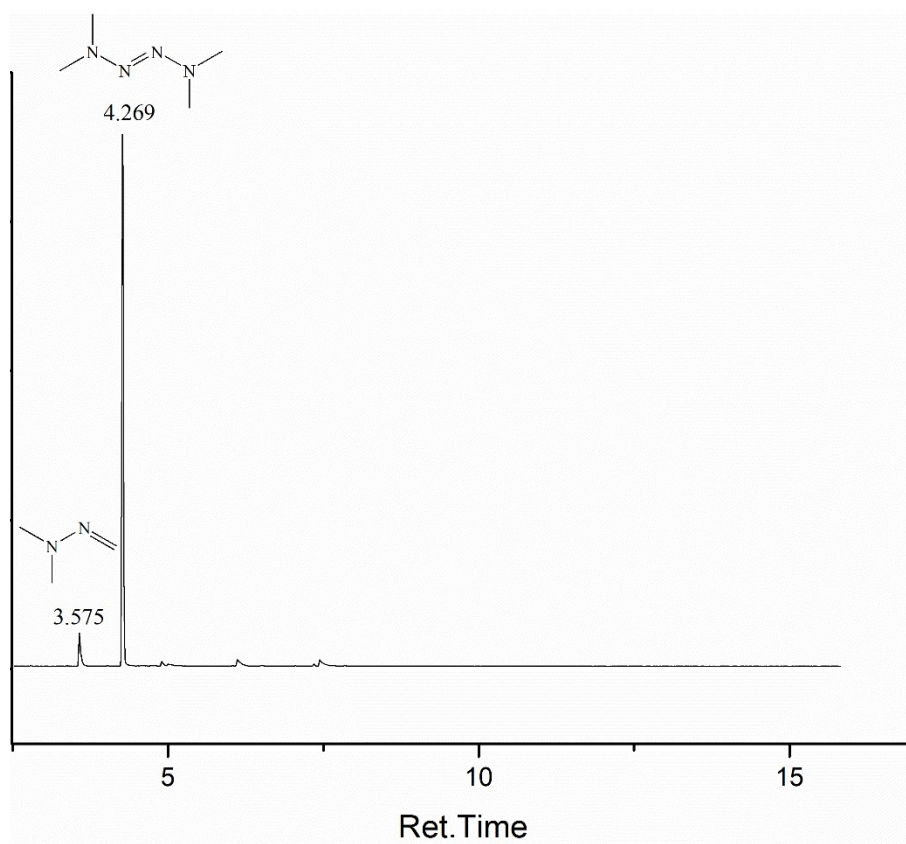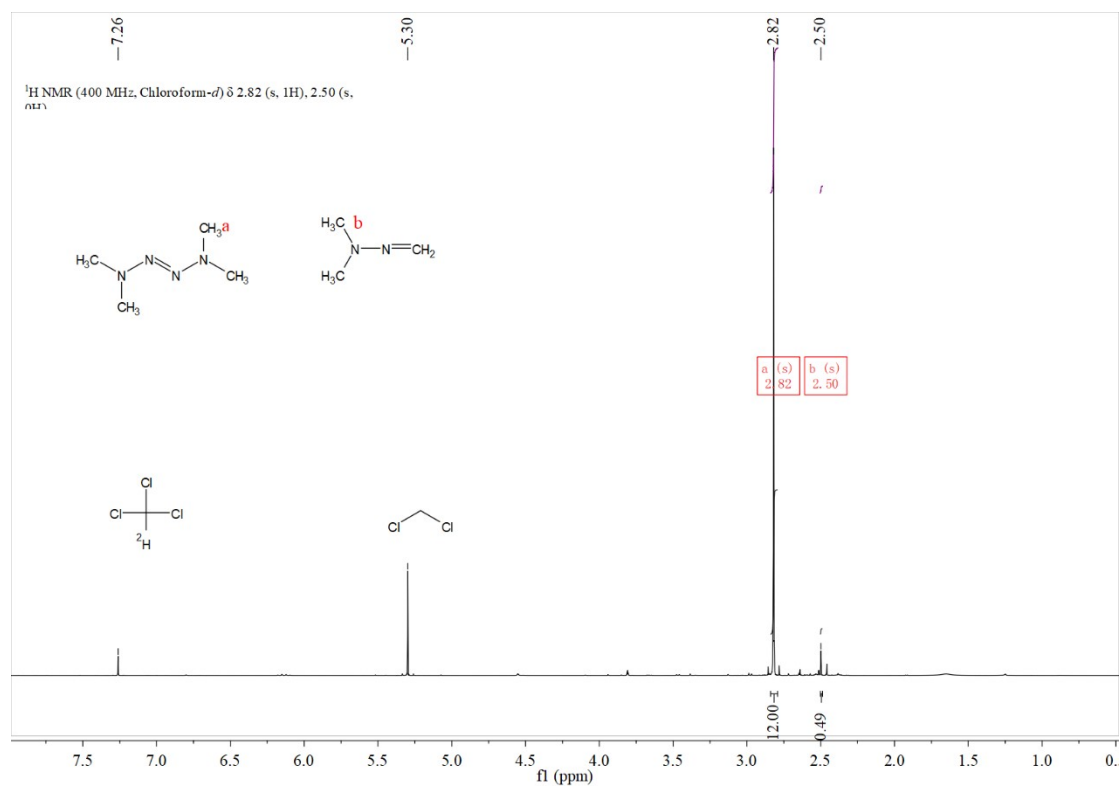

Fig. S2 GC-MS (top) and  $^1\text{H NMR}$  (bottom) of products in  $\text{CDCl}_3$  at 293 K with the electrodes of

Pt anode and C cathode)

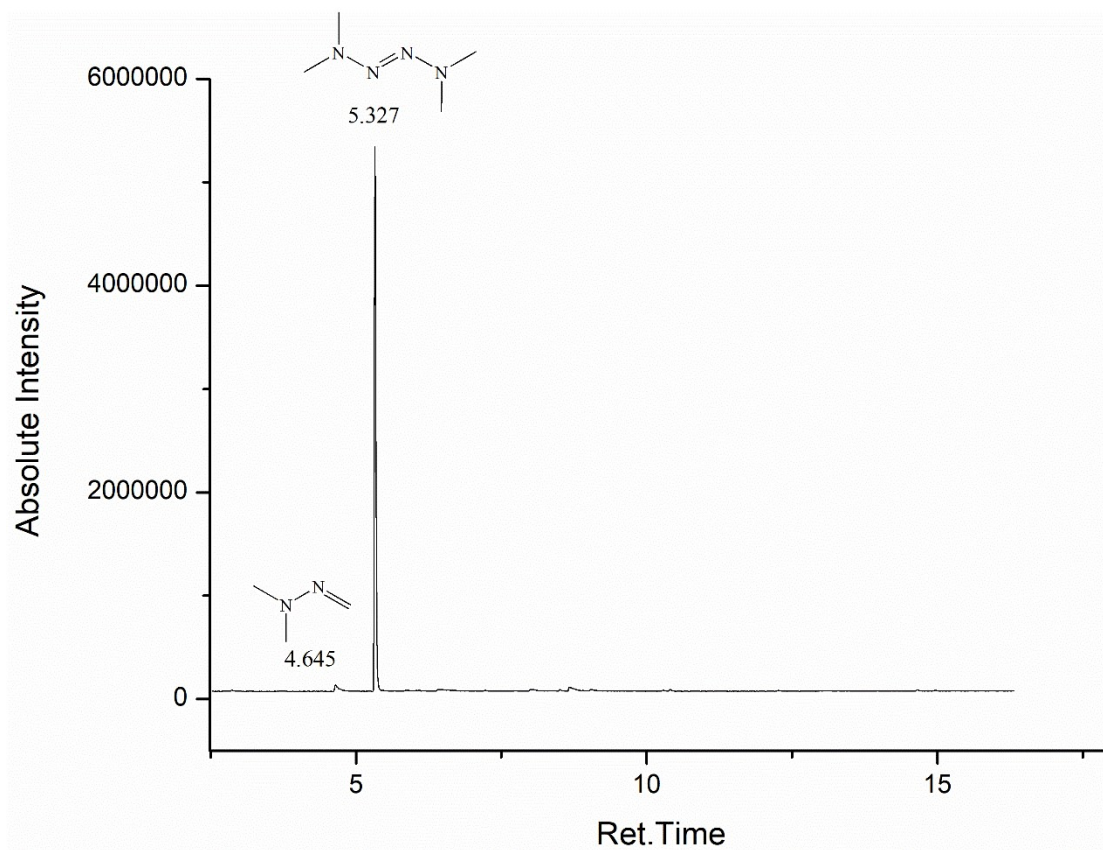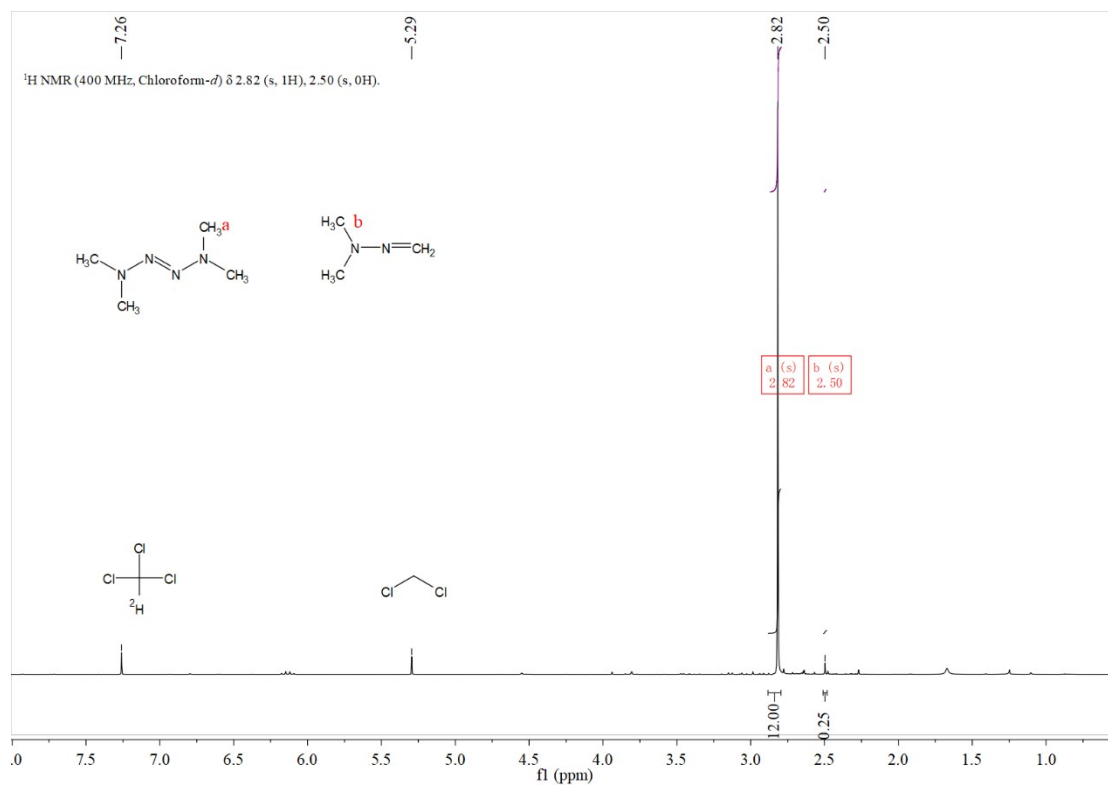

Fig. S3 GC-MS (top) and  $^1\text{H}$  NMR (bottom) of products in  $\text{CDCl}_3$  at 293 K with the electrodes of Pt anode and Ti cathode)

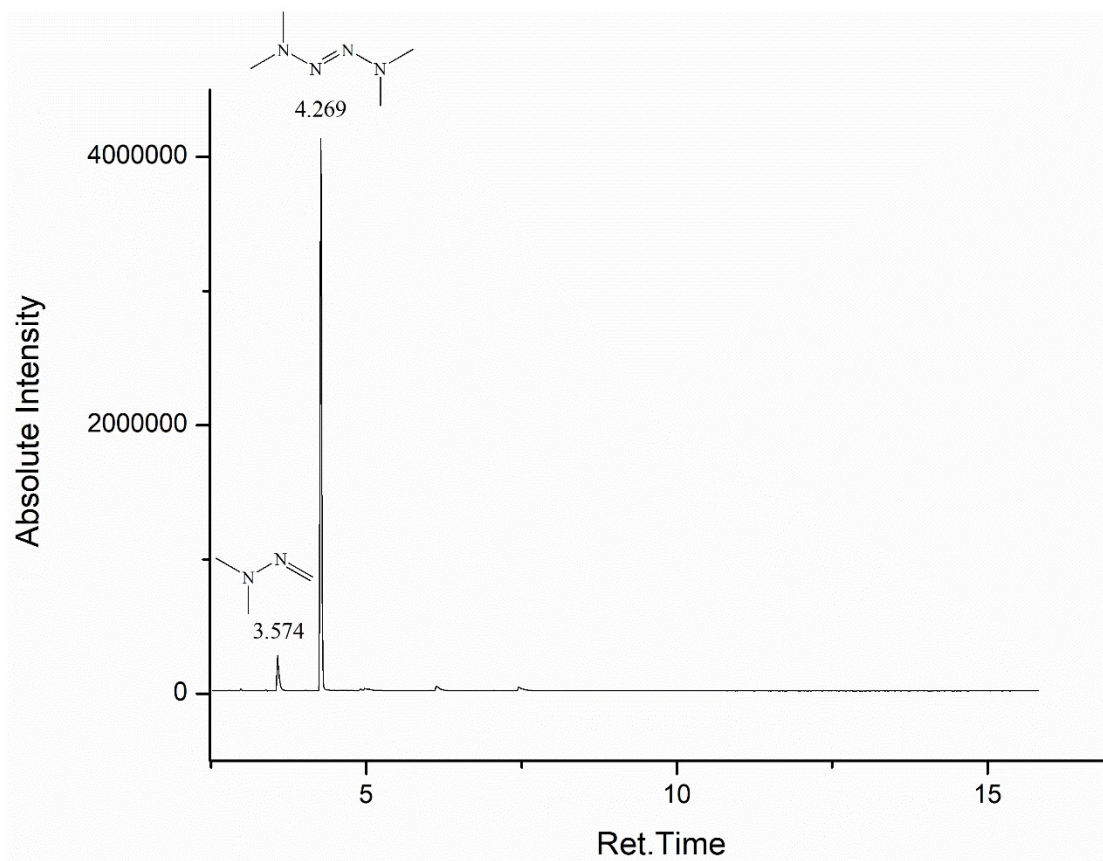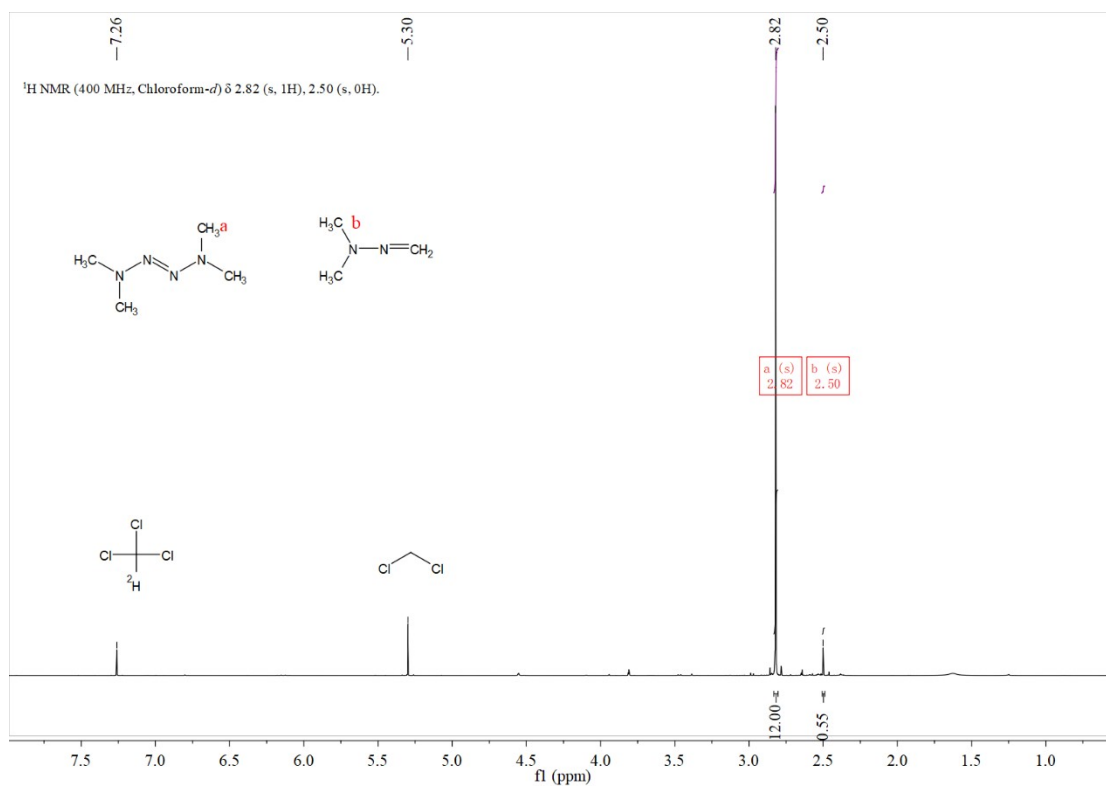

Fig. S4 GC-MS (top) and  $^1\text{H NMR}$  (bottom) of products in  $\text{CDCl}_3$  at 293 K with the electrodes of Au anode and C cathode

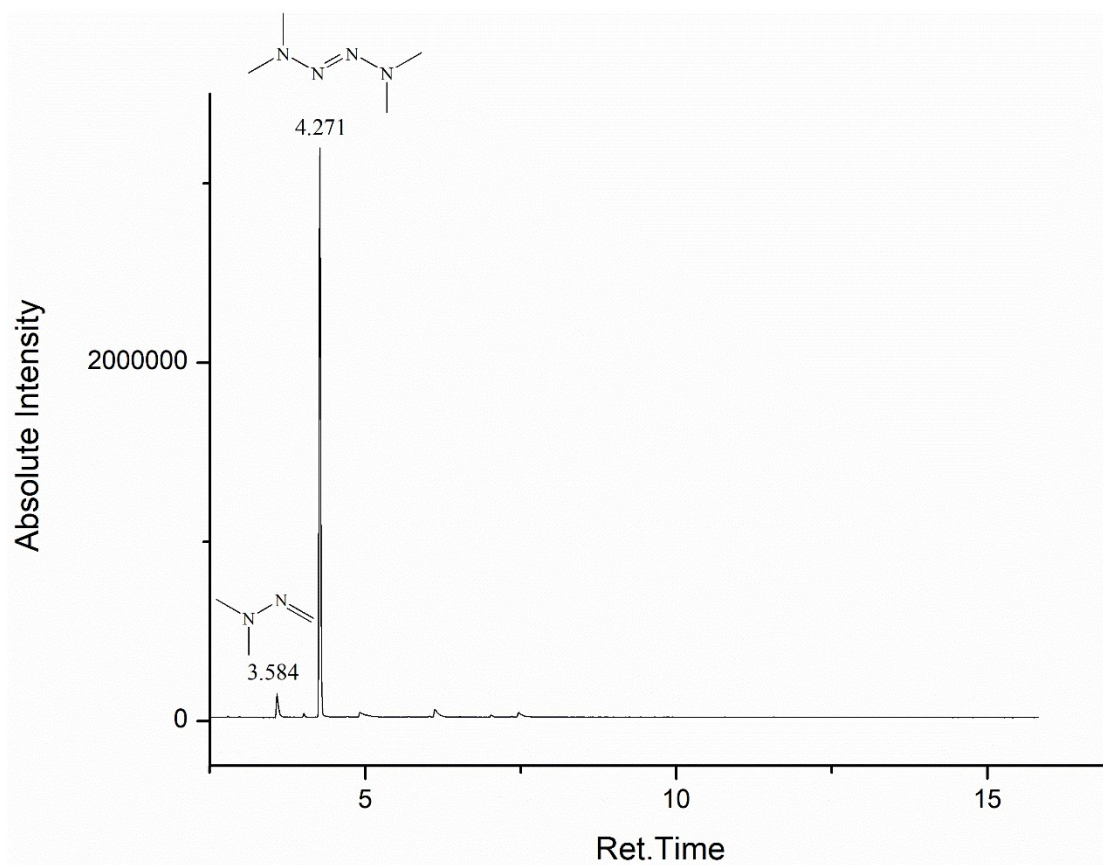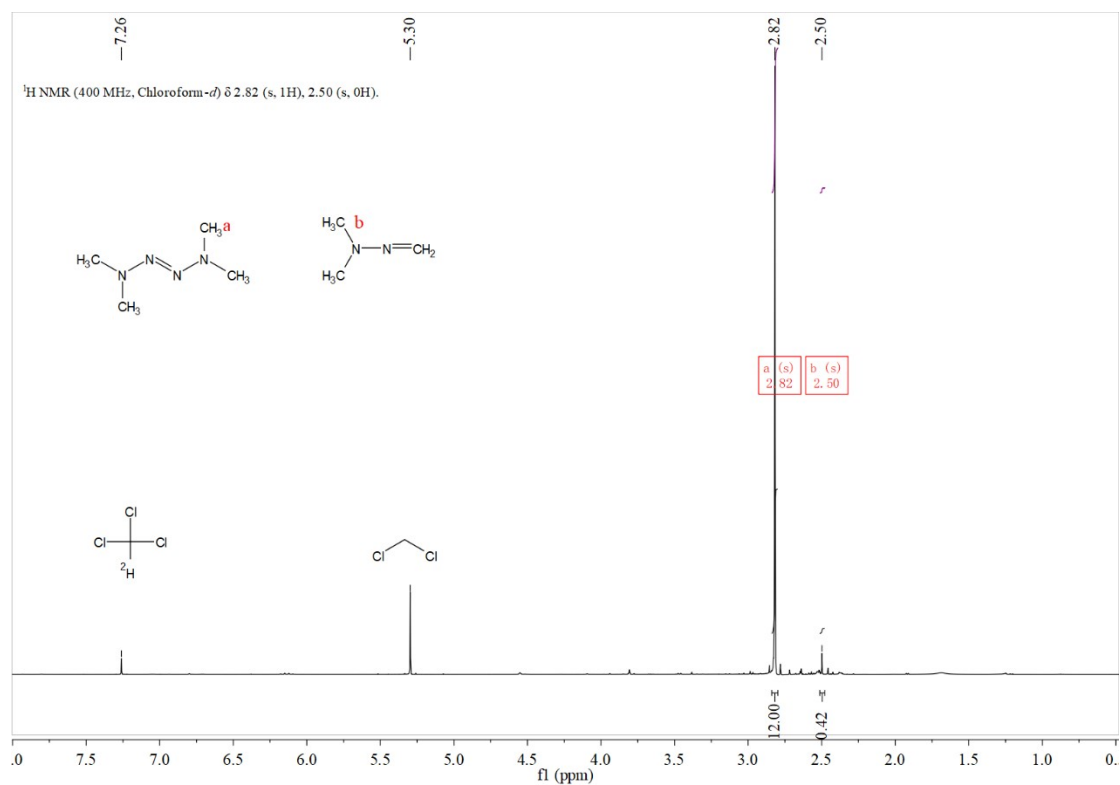

Fig. S5 GC-MS (top) and  $^1\text{H}$  NMR (bottom) of products in  $\text{CDCl}_3$  at 293 K with the electrodes of RuIr@Ti anode and C cathode



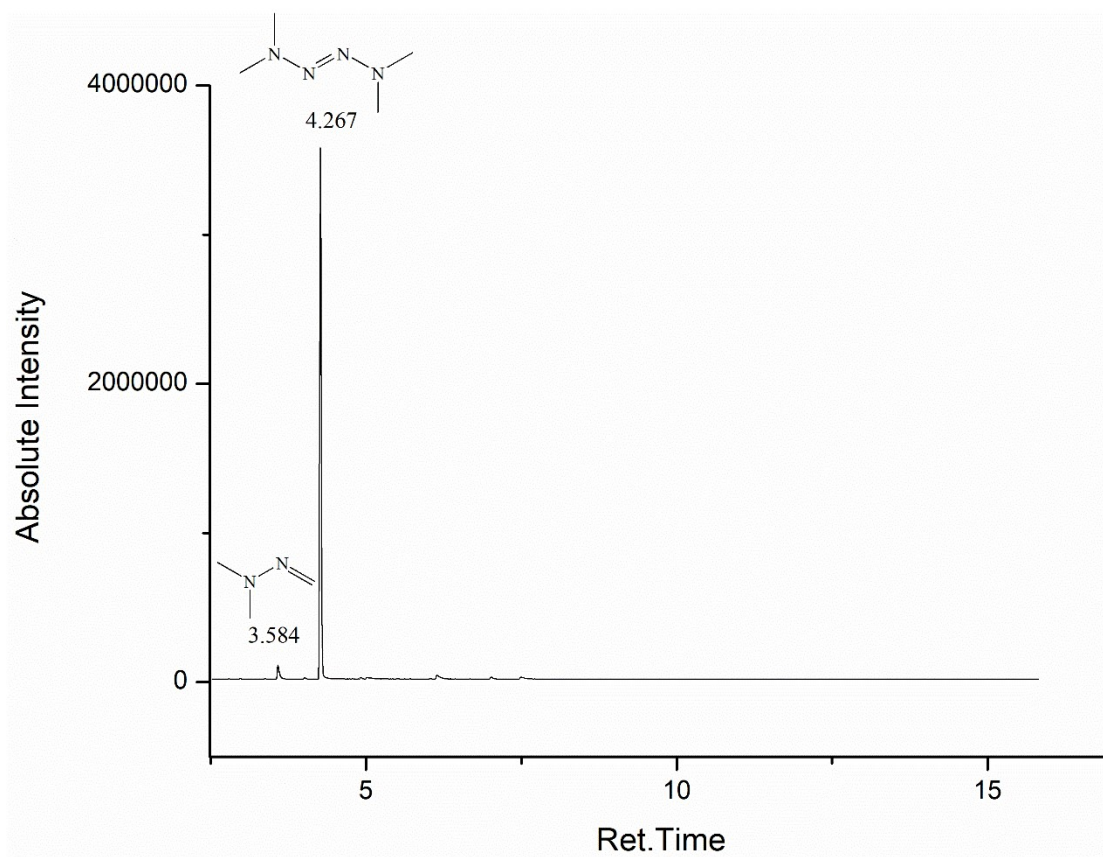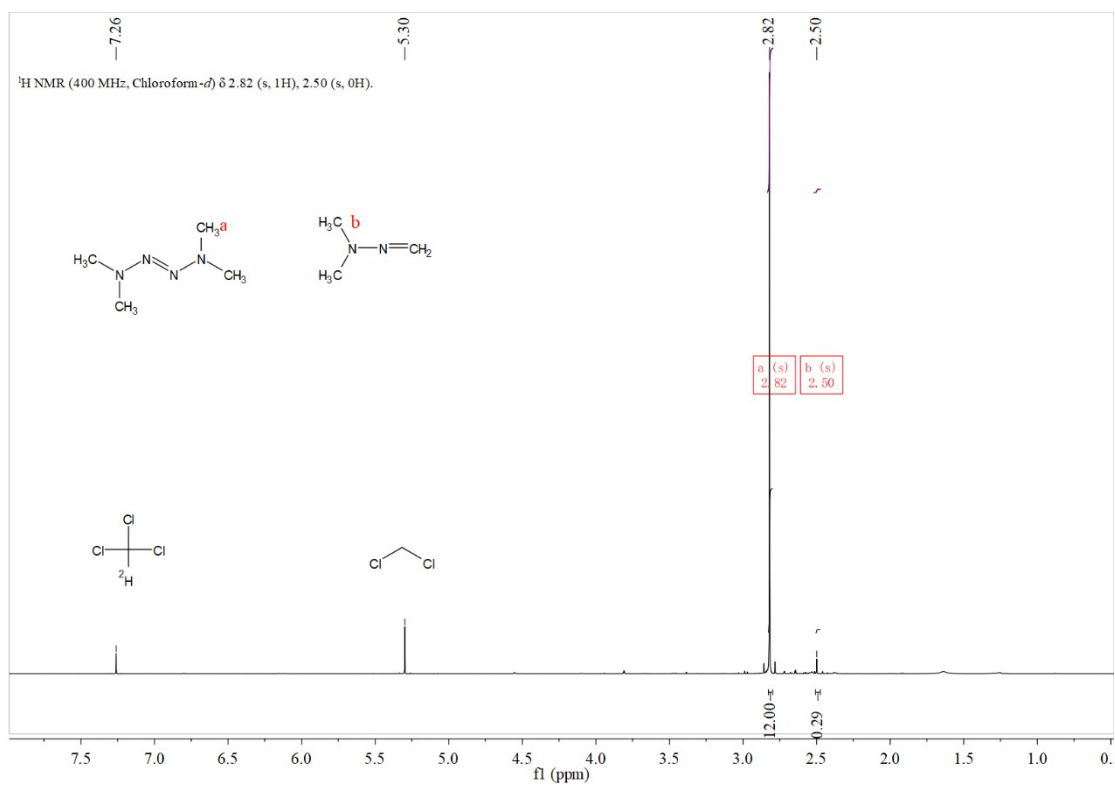

Fig. S6 GC-MS (top) and  $^1\text{H}$  NMR (bottom) of products in  $\text{CDCl}_3$  at 293 K with the electrodes of RuIr@Ti anode and Ti cathode

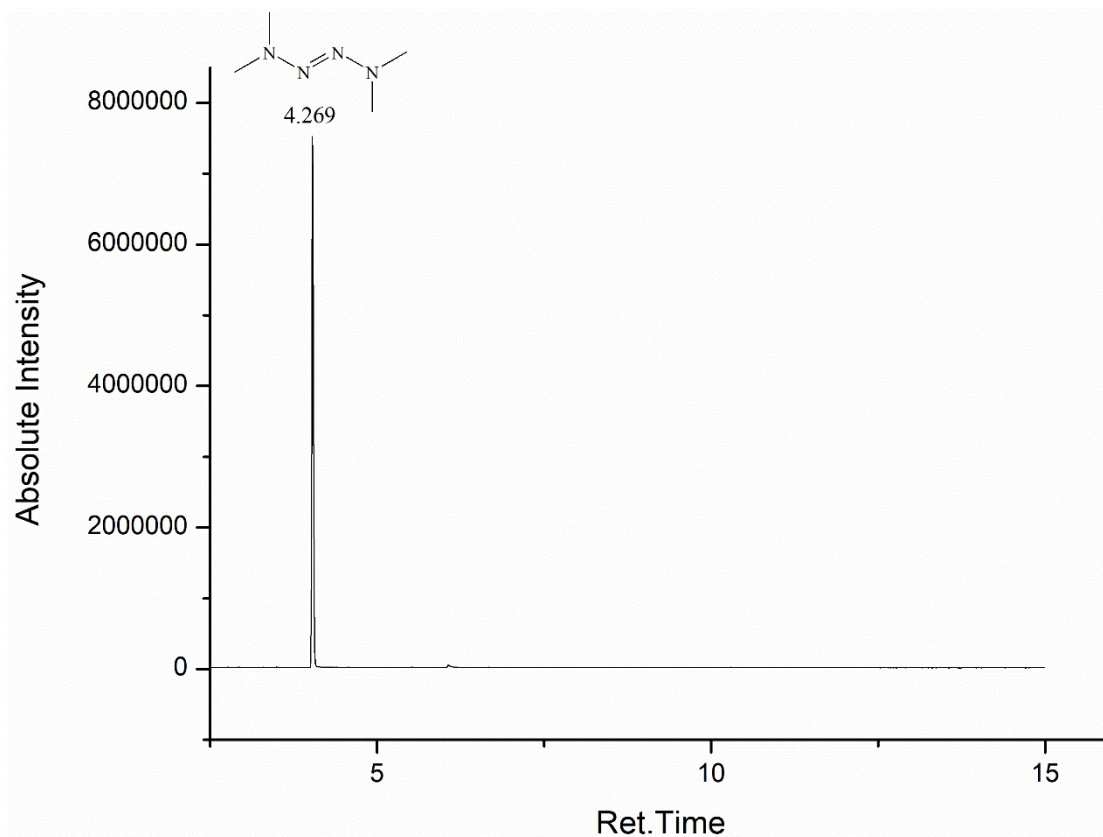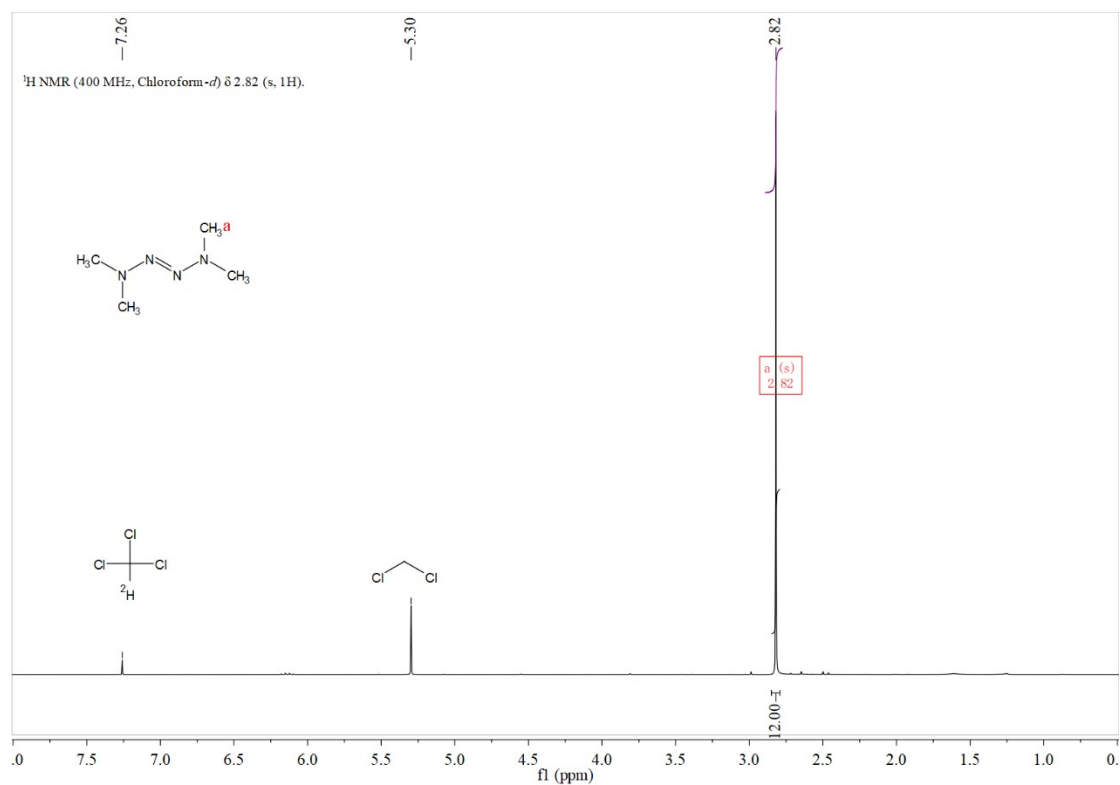

Fig. S7 GC-MS (top) and <sup>1</sup>H NMR (bottom) of products in CDCl<sub>3</sub> at 293 K with the electrodes of Ti-WM/Pt anode and Ti cathode.

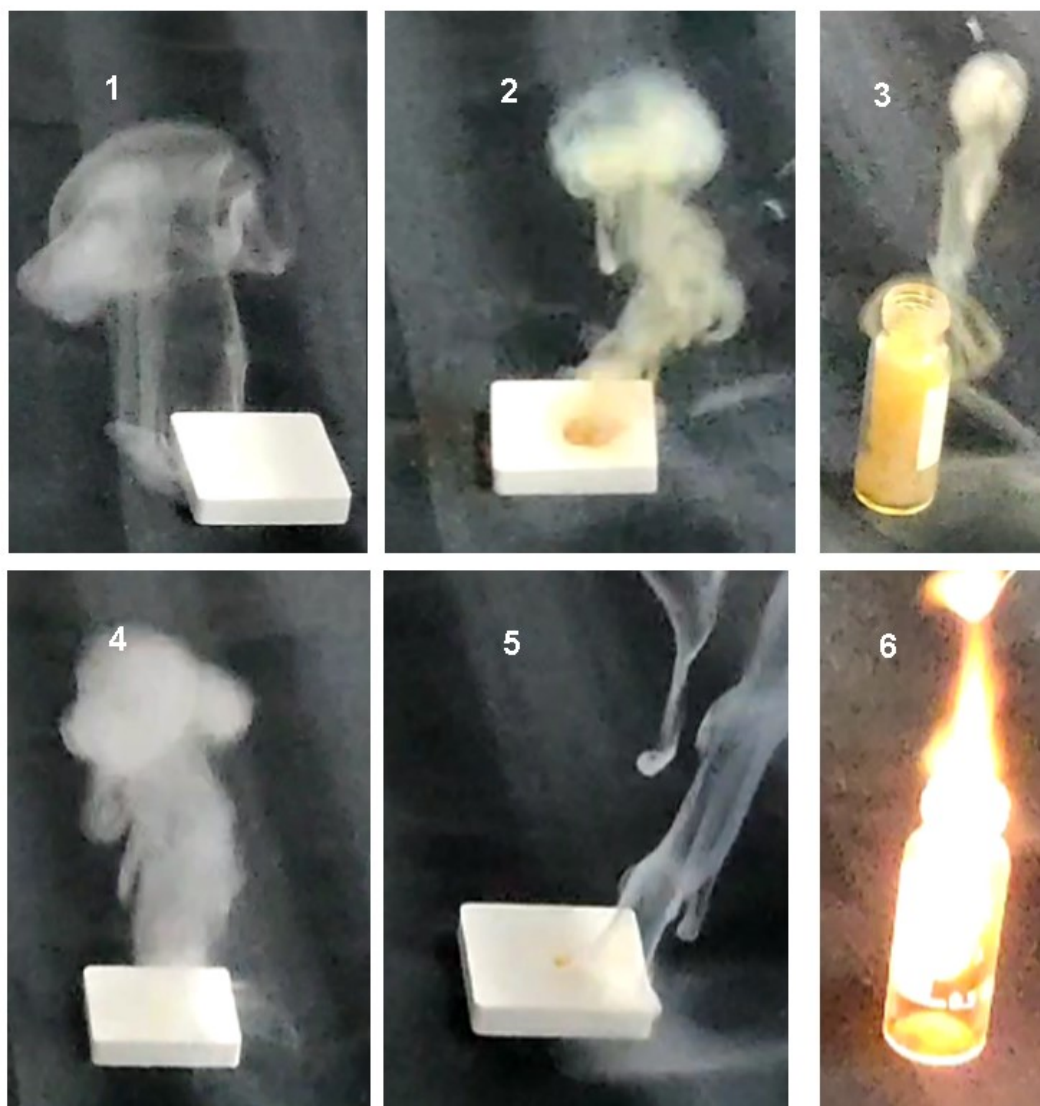

Fig. S8 Hypergolicity test of TMTZ and UDMH with oxidizers  $\text{H}_2\text{O}_2$ ,  $\text{HNO}_3$  and  $\text{N}_2\text{O}_4$ : (1) TMTZ/ $\text{H}_2\text{O}_2$ , (2) TMTZ/ $\text{HNO}_3$ , (3) TMTZ/ $\text{N}_2\text{O}_4$ , (4) UDMH/ $\text{H}_2\text{O}_2$ , (5) UDMH/ $\text{HNO}_3$ , (6) UDMH/ $\text{N}_2\text{O}_4$ .

**Table S1.** Hypergolicity data of TMTZ and UDMH with oxidizers  $\text{H}_2\text{O}_2$ ,  $\text{HNO}_3$  and  $\text{N}_2\text{O}_4$ .

| Mixtures                     | Contact time (s) | Ignition time (s) | Ignition delay time (s) |
|------------------------------|------------------|-------------------|-------------------------|
| TMTZ/ $\text{H}_2\text{O}_2$ | 4.976            | 5.457             | 0.481                   |
| TMTZ/ $\text{HNO}_3$         | 9.616            | 9.757             | 0.140                   |
| TMTZ/ $\text{N}_2\text{O}_4$ | 3.091            | 3.151             | 0.060                   |
| UDMH/ $\text{H}_2\text{O}_2$ | 22.744           | 22.962            | 0.218                   |
| UDMH/ $\text{HNO}_3$         | 8.122            | 8.182             | 0.060                   |
| UDMH/ $\text{N}_2\text{O}_4$ | 5.257            | 5.315             | 0.058                   |

[1]. Hampton C, Ramesh K, Smith J, Importance of chemical delay time in understanding hypergolic ignition behaviors. 41st Aerospace Sciences Meeting and Exhibit, AIAA2003-1359, 2003



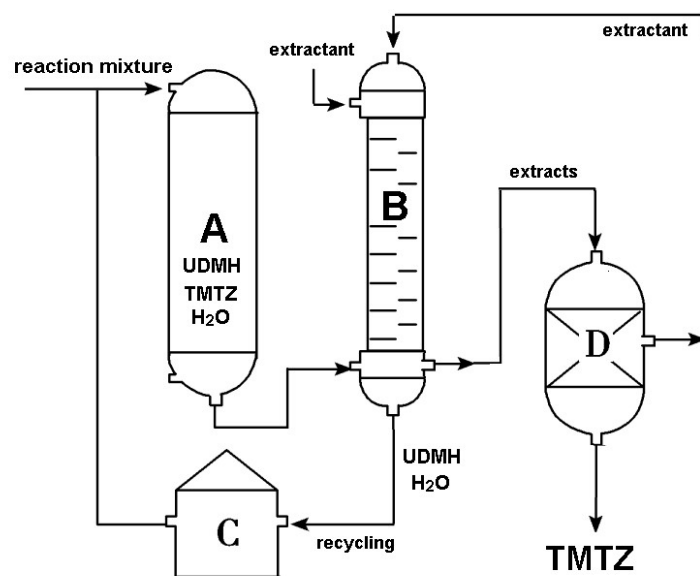

Fig. S9 Flowsheet of the continuous production process of TMTZ obtained from UDMH electrochemical oxidation: A electrochemical oxidation; B extraction; C pump; D rectification.
